# Supplementary material for: Stress-Hormone Dynamics and Working Memory in Healthy Women Who Use Oral Contraceptives Versus Non-Users
Source: PubMed Central journal article supplement (PMC8606688; doi:10.3389/fendo.2021.731994), 2021-11-08
Supplement: Table_1.pdf [file Table_1.pdf]

**1. Main analysis including hormonal IUD users in non-user group**

| <b><math>\beta</math></b> | <b>CI 95 %</b> | <b>p-value</b> |
|---------------------------|----------------|----------------|
| -181                      | [-315;-46]     | 0.01           |

When including hormonal IUD users in the non-user group, we found similar results as in our main analysis.
