# Supplementary material for: Stress-Hormone Dynamics and Working Memory in Healthy Women Who Use Oral Contraceptives Versus Non-Users
Source: PubMed Central journal article supplement (PMC8606688; doi:10.3389/fendo.2021.731994), 2021-11-08
Supplement: Table_2.pdf [file Table_2.pdf]

**2. Main analysis adjusting for awakening time instead of work day status**

| $\beta$ | CI 95 %    | p-value |
|---------|------------|---------|
| -200    | [-327;-58] | 0.005   |

Replacing work day status with awakening time did not change our results as awakening time did not contribute to the model (p-value = 0.79).
