# Supplementary material for: Stress-Hormone Dynamics and Working Memory in Healthy Women Who Use Oral Contraceptives Versus Non-Users
Source: PubMed Central journal article supplement (PMC8606688; doi:10.3389/fendo.2021.731994), 2021-11-08
Supplement: Table_3.pdf [file Table_3.pdf]

**Table 3: CAR regression report for A. Main model, B. Model including all covariates in CAR analysis****A.**

| <b>Coefficients</b> | <b>Value / Effect size</b> | <b>Standard Error</b> | <b>P-value</b> |
|---------------------|----------------------------|-----------------------|----------------|
| OC-use              | -203                       | 367.5                 | 0.006          |
| Age                 | -9.7                       | 8.404                 | 0.25           |
| Workday status      | -0.17                      | 67.30                 | 0.99           |
| BMI                 | 23.69                      | 14.66                 | 0.11           |

**B.**

| <b>Coefficients</b> | <b>Value / Effect size</b> | <b>Standard Error</b> | <b>P-value</b> |
|---------------------|----------------------------|-----------------------|----------------|
| OC-use (OC-user)    | -238                       | 92.4                  | 0.013          |
| Age                 | 11.2                       | 10.0                  | 0.27           |
| Work day            | -2.56                      | 81.71                 | 0.98           |
| BMI                 | 20.9                       | 18.36                 | 0.26           |
| PSQI                | 17.6                       | 16.77                 | 0.30           |
| 5HTLLPR genotype    | -6.97                      | 90.24                 | 0.94           |
| Cohens PSS          | -5.86                      | 7.86                  | 0.46           |
| TMD                 | 0.69                       | 3.44                  | 0.84           |
| Smoking (No smoker) | 101                        | 145.1                 | 0.49           |
| Season              | 26.6                       | 86.76                 | 0.76           |
