# Supplementary material for: Stress-Hormone Dynamics and Working Memory in Healthy Women Who Use Oral Contraceptives Versus Non-Users
Source: PubMed Central journal article supplement (PMC8606688; doi:10.3389/fendo.2021.731994), 2021-11-08
Supplement: Table_4.pdf [file Table_4.pdf]

**Table 4: Regression report for main WM analyses including potential covariates: A. LNS, B. SDMT**

**A.**

| <b>Coefficients</b> | <b>Value / Effect size</b> | <b>Standard Error</b> | <b>P-value</b> |
|---------------------|----------------------------|-----------------------|----------------|
| LNS                 | 0.16                       | 0.89                  | 0.85           |
| Education score     | -0.04                      | 0.30                  | 0.90           |
| Age                 | -0.03                      | 0.08                  | 0.68           |
| BMI                 | -0.14                      | 0.16                  | 0.39           |
| Smoking status      | -0.07                      | 1.34                  | 0.96           |
| TMD                 | 0.02                       | 0.03                  | 0.39           |
| PSQI                | -0.30                      | 0.17                  | 0.17           |

Analysis includes data 64 women as information on PSQI was not available on all women.

**B.**

| <b>Coefficients</b> | <b>Value / Effect size</b> | <b>Standard Error</b> | <b>P-value</b> |
|---------------------|----------------------------|-----------------------|----------------|
| SDMT                | 4.2                        | 3.09                  | 0.18           |
| Education score     | 1.5                        | 0.92                  | 0.10           |
| Age                 | 0.16                       | 0.23                  | 0.49           |
| BMI                 | 0.43                       | 0.49                  | 0.37           |
| Smoking status      | 4.58                       | 4.07                  | 0.26           |
| TMD                 | -0.08                      | 0.09                  | 0.38           |
| PSQI                | 0.46                       | 0.56                  | 0.41           |

Analysis includes data 62 women as information on PSQI was not available on all women.
